# Supplementary material for: Neuroinflammation and Mitochondrial Dysfunction in Parkinson’s Disease: Connecting Neuroimaging with Pathophysiology
Source: MDPI journal article supplement (doi:10.3390/antiox12071411), 2023-07-12
Supplement: s1 [file s1]

Table S2. PET-based neuroimaging studies in PwPD to map neuroinflammation.

| Authors                                                            | Study Type      | Subjects                                                              | Scanner   | Radioligand                                   | ROIs                                                                                                                                                     | Results/Conclusion                                                                                                                                                                                                                                                                        |
|--------------------------------------------------------------------|-----------------|-----------------------------------------------------------------------|-----------|-----------------------------------------------|----------------------------------------------------------------------------------------------------------------------------------------------------------|-------------------------------------------------------------------------------------------------------------------------------------------------------------------------------------------------------------------------------------------------------------------------------------------|
| <b><i>Astroglia cells (imidazoline-2- and MAO-B receptors)</i></b> |                 |                                                                       |           |                                               |                                                                                                                                                          |                                                                                                                                                                                                                                                                                           |
| Wilson et al., 2019                                                | cross-sectional | 8 esPwPD vs.<br>14 lsPwPD vs.<br>14 HCs                               | Siemens   | [ <sup>18</sup> F]-BU99008<br>(imidazoline-2) | whole-brain (ROI-wise)                                                                                                                                   | evidence for the <i>in-vivo</i> role of astroglia in the initiation and progression of PD                                                                                                                                                                                                 |
| Schönecker et al., 2019                                            | cross-sectional | 9 PwPD vs.<br>6 PwMSAp vs.<br>6 PwMSAc vs.<br>13 PwPSP                | GE        | [ <sup>18</sup> F]-THK5351 (MAO-B)            | whole-brain (ROI- and voxel-wise)                                                                                                                        | combined MAO-B and tau binding of [ <sup>18</sup> F]-THK5351 facilitates differential diagnosis of PwAP                                                                                                                                                                                   |
| <b><i>Cannabinoid (CB1 receptor)</i></b>                           |                 |                                                                       |           |                                               |                                                                                                                                                          |                                                                                                                                                                                                                                                                                           |
| Ajalin et al., 2022                                                | cross-sectional | 16 PwPD vs.<br>10 HCs                                                 |           | [ <sup>18</sup> F]-FMPEP-d2                   | putamen, SN, globus pallidus, thalamus, amygdala, hippocampus, insula, corpus callosum, cerebellum, and frontal, parietal, temporal, and occipital lobes | PwPD have lower CB1 receptor availability compared with HCs, dopaminergic medication increases CB1 receptor availability in PwPD toward normal levels                                                                                                                                     |
| Ceccarini et al., 2019                                             | cross-sectional | 38 PwPD vs.<br>10 HC                                                  | Siemens   | [ <sup>18</sup> F]-MK-9470                    | whole-brain (voxel-wise)                                                                                                                                 | decreased CB1 receptor availability in the prefrontal and midcingulate cortex in PwPD is strongly correlated with disturbances in executive functioning, episodic memory and visuospatial functioning                                                                                     |
| <b><i>Adenosine (A2A receptor)</i></b>                             |                 |                                                                       |           |                                               |                                                                                                                                                          |                                                                                                                                                                                                                                                                                           |
| Ishibashi et al., 2018                                             | cross-sectional | 10 PwPD vs.<br>6 HC                                                   | GE        | [ <sup>11</sup> C]-preladenant                | ventral striatum, caudate, and putamen                                                                                                                   | maximal A2 receptor occupancy in the ventral striatum, in the caudate, and in the putamen, no significant differences in binding profiles between PwPD and HCs                                                                                                                            |
| Mishina et al., 2017                                               | cross-sectional | 16 PwPD vs.<br>6 HC                                                   | SET-2400W | [ <sup>11</sup> C]-TMSX                       | putamen, caudate, frontal, temporal, and occipital lobe                                                                                                  | distribution volume ratio of A2A receptors in the putamen is larger in PwPD w/dyskinesia compared to HC. In the drug-naïve PwPD the A2A receptors in the putamen was lower on the more affected side. A2A receptors were significantly increased after initiation of dopaminergic therapy |
| Ramlackhansingh et al., 2011                                       | cross-sectional | 12 PwPD                                                               | Siemens   | [ <sup>11</sup> C]-SCH442416                  | caudate, putamen, thalamus                                                                                                                               | A2A receptor binding in the caudate and putamen of PwPD w/ dopaminergic therapy was higher than in PwPD w/o dopaminergic therapy                                                                                                                                                          |
| Waggan et al., 2023                                                | cross-sectional | 18 PwPD vs.<br>6 HC                                                   | ECAT HRRT | [ <sup>11</sup> C]-TMSX                       | caudate, putamen, thalamus                                                                                                                               | A2A receptors increased bilaterally in the pallidum of moderate-stage PwPD compared to HCs, increased mean striatal binding positively correlated with motor symptom severity.                                                                                                            |
| Ishibashi et al., 2022                                             | RCT             | 5 PwPD<br>(3 treated w/ 130 mg and<br>2 w/ 259 mg of caffeine)        | GE        | [ <sup>11</sup> C]-preladenant                | striatum                                                                                                                                                 | mean occupancy rates of striatal A2A receptors R increased with caffeine dosage                                                                                                                                                                                                           |
| <b><i>Blood-Brain-Barrier (BBB)</i></b>                            |                 |                                                                       |           |                                               |                                                                                                                                                          |                                                                                                                                                                                                                                                                                           |
| Bartels et al., 2008                                               | cross-sectional | 10 esPwPD vs.<br>10 lsPwPD vs.<br>5 PwPSP vs.<br>4 PwMSA vs.<br>9 HCs | Siemens   | [ <sup>11</sup> C]-verapamil                  | whole-brain (voxel-wise)                                                                                                                                 | lsPwPD and PwPSP revealed increased tracer uptake in frontal white matter regions compared to HCs. esPwPD showed lower uptake in the midbrain and frontal brain regions                                                                                                                   |
| Fujita et al., 2021                                                | cross-sectional | 19 PwPD vs.<br>12 HCs                                                 | GE        | [ <sup>82</sup> Rb]-Rubidium                  | bilateral anterior cingulate cortex, posterior putamen, and thalamus, right superior temporal gyrus and inferior parietal lobule                         | no changes in [ <sup>82</sup> Rb]-Rubidium uptake between PwPD and HCs                                                                                                                                                                                                                    |

In this table, we highlight how different mentioned PET-based neuroimaging methods have been previously used in PwPD. BBB: blood-brain-barrier. BG: basal ganglia. esPwPD: early-stage patients with Parkinson's disease. HCs: healthy controls. lsPwPD: late-stage patients with Parkinson's disease. PwAP: patients with atypical parkinsonism. PwMSAp: patients with multiple systems atrophy with predominant parkinsonism. PwMSAp: patients with multiple systems atrophy, cerebellar type. PwPD: patients with Parkinson's disease. PwPSP: patients with progressive supranuclear palsy. ROI: region of interest.
