# Supplementary material for: Neuroinflammation and Mitochondrial Dysfunction in Parkinson’s Disease: Connecting Neuroimaging with Pathophysiology
Source: MDPI journal article supplement (doi:10.3390/antiox12071411), 2023-07-12
Supplement: s1 [file s1]

Table S3. MRI-based neuroimaging studies in PwPD to map neuroinflammation.

| Author                                                            | Study Type      | Subjects                                      | Scanner       | Sequence                                                    | ROIs                                                                           | Outcomes                                                | Results/Conclusion                                                                                                                                                                          |
|-------------------------------------------------------------------|-----------------|-----------------------------------------------|---------------|-------------------------------------------------------------|--------------------------------------------------------------------------------|---------------------------------------------------------|---------------------------------------------------------------------------------------------------------------------------------------------------------------------------------------------|
| <i>Diffusion Kurtosis Imaging (DKI)</i>                           |                 |                                               |               |                                                             |                                                                                |                                                         |                                                                                                                                                                                             |
| Bai et al., 2021                                                  | cross-sectional | 64 esPwPD vs. 44 IsPwPD vs. 64 HCs            | GE 3.0 T      | two-shell diffusion SP-EPI                                  | BG                                                                             | diffusion metrics                                       | PwPD revealed progressive microstructural alterations in the subcortical nuclei detectable with DKI                                                                                         |
| Guan et al., 2019                                                 | cross-sectional | 26 PwPD vs. 15 HCs                            | GE 3.0 T      | SE-EPI                                                      | SN, RN                                                                         | diffusion metrics                                       | decreased mean kurtosis values in the SN are a surrogate marker of disease severity and may facilitate early diagnosis                                                                      |
| Rong et al., 2022                                                 | cross-sectional | 20 esPwPD vs. 15 IsPwPD vs. 20 HCs            | GE 3.0 T      | two-shot SE-EPI                                             | BG, thalamus, pons, midbrain                                                   | diffusion metrics                                       | alterations of advanced diffusion metrics in the SN may have potential in detecting esPwPD                                                                                                  |
| Surova et al., 2016                                               | cross-sectional | 105 PwPD vs. 44 HC                            | Siemens 3.0 T | single-shot SE-EPI                                          | BG, thalamus, pons, midbrain                                                   | diffusion metrics                                       | PwPD patients exhibit microstructural changes in the putamen, the thalamus, and other brain regions, which are predictive for disease severity                                              |
| Surova et al., 2018                                               | longitudinal    | 76 PwPD vs. 38 HCs                            | Siemens 3.0 T | single-shot SE-EPI                                          | BG, thalamus                                                                   | diffusion metrics                                       | microstructural changes in the putamen of PwPD can be detected over a 2-year period with DKI                                                                                                |
| <i>Double Diffusion Encoding (DDE) Imaging</i>                    |                 |                                               |               |                                                             |                                                                                |                                                         |                                                                                                                                                                                             |
| Kamiya et al., 2020                                               | cross-sectional | 27 PwPD vs. 23 HCs                            | Siemens 3.0 T | LTE and PTE pairs of diffusion sensitizing gradients blocks | anterior corona radiata, internal capsule, corpus callosum, subcortical WM     | diffusion metrics, within-subject variation coefficient | reductions of kurtosis in normal aging (HCs) and PwPD are likely driven by the reduction in microscopic anisotropy, microscopic anisotropy correlated with motor symptom severity in PwPD   |
| <i>Neurite Orientation Dispersion and Density Imaging (NODDI)</i> |                 |                                               |               |                                                             |                                                                                |                                                         |                                                                                                                                                                                             |
| Andica et al., 2018                                               | cross-sectional | 29 PwPD vs. 29 HCs                            | Siemens 3.0 T | SE-EPI, Multishell DWI                                      | whole-brain (TBSS)                                                             | diffusion metrics                                       | reduction in advanced diffusion metrics in the nigrostriatal pathway was more pronounced in PwPD                                                                                            |
| Andica et al., 2020                                               | cross-sectional | 29 PwPD vs. 25 HCs                            | Siemens 3.0 T | SE-EPI, Multishell DWI                                      | whole-brain (TBSS)                                                             | diffusion metrics                                       | widespread reduction in advanced diffusion metrics in PwPD                                                                                                                                  |
| Kamagata et al., 2016                                             | cross-sectional | 58 PwPD vs. 36 HCs                            | Philips 3.0 T | SE-EPI                                                      | BG, SN                                                                         | diffusion metrics                                       | reduction in advanced diffusion metrics reflect lower SN neurite density                                                                                                                    |
| Loeherer et al., 2022                                             | cross-sectional | 33 PwPD vs. 32 HCs                            | Siemens 3.0 T | DWI - DTI - NODDI/DTI                                       | whole-brain (WM tracts)                                                        | diffusion metrics                                       | Increased advanced diffusion metrics in subcortical, cortical, and cerebellar structures in PwPD                                                                                            |
| Mitchell et al., 2019*                                            | cross-sectional | 44 PwPD vs. 21 PwMSAp vs. 26 PwPSP vs. 24 HCs | Siemens 3.0 T | Multi-shell DWI                                             | BG, corpus callosum, thalamus, midbrain, cerebellum                            | diffusion metrics                                       | NODDI-derived advanced diffusion metrics and FWI offer similar discriminability between PwPD and PwAP                                                                                       |
| Ogawa et al., 2021                                                | cross-sectional | 51 PwPD vs 23 HCs                             | Siemens 3.0 T | SE-EPI, Multishell DWI                                      | whole-brain (WM tracts)                                                        | diffusion metrics                                       | reduction in advanced diffusion metrics in the temporal WM fibers are associated with dyskinesias                                                                                           |
| <i>Free Water Imaging (FWI)</i>                                   |                 |                                               |               |                                                             |                                                                                |                                                         |                                                                                                                                                                                             |
| Andica et al., 2019                                               | cross-sectional | 20 PwPD vs. 20 HCs                            | Siemens 3.0 T | SE-EPI, Multishell DWI                                      | whole-brain (TBSS)                                                             | FW, diffusion metrics                                   | PwPD revealed lower FWI indices in anterior WM, while showing an increase in posterior WM areas; potential role of FWI as an in-vivo biomarker of disease progression and neuroinflammation |
| Arribarat et al., 2019                                            | cross-sectional | 18 PwPD vs. 21 HCs                            | Siemens 3.0 T | SE-EPI                                                      | SN                                                                             | FW, T2*, diffusion metrics                              | T2* and FWI differences are reflecting complementary pathophysiological pathways                                                                                                            |
| Gatusso et al., 2022                                              | cross-sectional | 130 PwPD vs. 58 HCs                           | Siemens 3.0 T | 2D single-shot SE-EPI                                       | thalamus, dorsomedial nucleus, Meynert nucleus, hippocampus, entorhinal cortex | FW, diffusion metrics                                   | Thalamic dorsal motor nucleus FW is a progression biomarker in esPwPD                                                                                                                       |

|                    |                 |                                  |               |                |    |                                              |                                                                                                                                                                 |
|--------------------|-----------------|----------------------------------|---------------|----------------|----|----------------------------------------------|-----------------------------------------------------------------------------------------------------------------------------------------------------------------|
| Zhang et al., 2022 | cross-sectional | 65 PwPD vs. 37 PwiRBD vs. 41 HCs | Siemens 3.0 T | not provided   | SN | FW, Susceptibility values, diffusion metrics | QSM and FWI have similar discriminative power in the diagnosis of esPwPD. While the combination of these two methods further increases the discriminative power |
| Arpin et al., 2022 | RCT             | 90 PwPD                          | Siemens 3.0 T | Multishell DWI | SN | FW, diffusion metrics                        | FW correlated with motor symptom severity in PwPD                                                                                                               |

#### ***Dynamic Contrast-Enhanced (DCE) MRI - Gd-based***

|                         |                 |                                   |               |                  |             |              |                                                                                                                                                                                                            |
|-------------------------|-----------------|-----------------------------------|---------------|------------------|-------------|--------------|------------------------------------------------------------------------------------------------------------------------------------------------------------------------------------------------------------|
| Al-Bachari et al., 2020 | cross-sectional | 49 PwPD vs. 46 HCs                | Philips 3.0 T | T1-weighted + Gd | whole-brain | $K^{trans}$  | higher $K^{trans}$ in PwPD, especially in posterior WM regions, indicates BBB disruption                                                                                                                   |
| Ding et al., 2021       | cross-sectional | 398 PwPD vs. 319 PwAP vs. 371 HCs | Siemens 3.0 T | T1-weighted + Gd | whole-brain | time to peak | impaired lymphatic drainage in PwPD. Experimental results in animal models demonstrate that lymphatic drainage dysfunctions aggravate alpha-synuclein pathology and contributes to the disease progression |

#### ***Dynamic Contrast-Enhanced (DCE) MRI - SPIO-based***

|                     |                 |                                     |              |                                                                             |    |                                        |                                                          |
|---------------------|-----------------|-------------------------------------|--------------|-----------------------------------------------------------------------------|----|----------------------------------------|----------------------------------------------------------|
| Sharma et al., 2022 | cross-sectional | PwPD and HCs (numbers not provided) | not provided | SWI + SPIO, MICRO (Microvascular In-vivo Contrast Revealed Origins) imaging | SN | voxel intensity (vascular enhancement) | detailed mapping of SN microvasculature in PwPD possible |
|---------------------|-----------------|-------------------------------------|--------------|-----------------------------------------------------------------------------|----|----------------------------------------|----------------------------------------------------------|

In this table, we highlight how different mentioned MRI-based neuroimaging methods have been previously used in PwPD. However, most of these studies did not discuss their findings concerning neuroinflammation. \*This study also investigates the role of FWI in PwPD. BBB: blood-brain-barrier. BG: basal ganglia. DCE: dynamic contrast-enhanced MRI. DDE: double diffusion encoding imaging. DKI: diffusion kurtosis imaging. DWI: diffusion-weighted imaging. DTI: diffusion tensor imaging. esPwPD: early-stage patients with Parkinson's disease. FW: free water. FWI: free water imaging. Gd: gadolinium. HCs: healthy controls. IsPwPD: late-stage patients with Parkinson's disease. LTE: linear tensor encoding. MRI: magnetic resonance imaging. NODDI: neurite orientation dispersion and density imaging. PTE: planar tensor encoding. PwAP: patients with atypical parkinsonism. PwiRBD: patients with idiopathic REM-sleep behavior disorder. PwMSAp: patients with multiple systems atrophy with predominant parkinsonism. PwPD: patients with Parkinson's disease. PwPSP: patients with progressive supranuclear palsy. QSM: quantitative susceptibility-weighted imaging. RN: red nucleus. SE-EPI: spin-echo - echo planar imaging. SN: substantia nigra. SPIO: superparamagnetic iron oxide. SWI: susceptibility-weighted imaging. TBSS: tract-based spatial statistics. WM: white matter.
