# Supplementary material for: Neuroinflammation and Mitochondrial Dysfunction in Parkinson’s Disease: Connecting Neuroimaging with Pathophysiology
Source: MDPI journal article supplement (doi:10.3390/antiox12071411), 2023-07-12
Supplement: s1 [file s1]

**Table S1. Preclinical/experimental neuroimaging studies in PD animal models to map neuroinflammation.**

| Authors                                                                                         | Study Type                   | Subjects                                                           | Scanner         | Method                     | ROIs                                                     | Results/Conclusion                                                                                                                                                                                                                                                          |
|-------------------------------------------------------------------------------------------------|------------------------------|--------------------------------------------------------------------|-----------------|----------------------------|----------------------------------------------------------|-----------------------------------------------------------------------------------------------------------------------------------------------------------------------------------------------------------------------------------------------------------------------------|
| <b><i>PET-based neuroimaging studies - Cannabinoid (CB1 receptor)</i></b>                       |                              |                                                                    |                 |                            |                                                          |                                                                                                                                                                                                                                                                             |
| Casteels et al., 2010                                                                           | preclinical/<br>experimental | 10 treated<br>(quinolinic acid)<br>rats vs.<br>10 non-treated rats | Concord         | [ <sup>18</sup> F]-MK-9470 | whole-brain (voxel-wise)                                 | changes in endocannabinoid transmission, specifically for CB1 receptors in the quinolinic acid-treated rat model of PD, with mainly involvement of the caudate/putamen, but also distant regions of the motor circuitry, including the cerebellum and somatosensory cortex. |
| <b><i>PET-based neuroimaging studies - Adenosine (A2A receptor)</i></b>                         |                              |                                                                    |                 |                            |                                                          |                                                                                                                                                                                                                                                                             |
| Schröder et al., 2020                                                                           | preclinical/<br>experimental | 12 healthy mice                                                    | Mediso nanoScan | [ <sup>18</sup> F]-FESCH   | striatum                                                 | no significant difference in the striatal A2A receptor density between rotenone-treated mice and controls                                                                                                                                                                   |
| <b><i>MRI-based neuroimaging studies - Diffusion Kurtosis Imaging (DKI)</i></b>                 |                              |                                                                    |                 |                            |                                                          |                                                                                                                                                                                                                                                                             |
| Arab et al., 2019                                                                               | preclinical/<br>experimental | 20 toxin- vs.<br>11 saline-injected<br>mice                        | Bruker 9.4 T    | two-shot SE-EPI            | SN, striatum, sensorimotor cortex, hippocampus, thalamus | decrease in kurtosis in SN, striatum and sensorimotor cortex                                                                                                                                                                                                                |
| Khairnar et al., 2016                                                                           | preclinical/<br>experimental | 9 transgenic vs.<br>12 wt mice                                     | Bruker 9.4 T    | two-shot SE-EPI            | SN, striatum, sensorimotor cortex, hippocampus, thalamus | increased kurtosis and decreased diffusivity values in GM regions such as the thalamus and sensorimotor cortex; alpha-synuclein levels positively correlated with kurtosis and negatively correlated with diffusivity                                                       |
| <b><i>MRI-based neuroimaging studies - Dynamic Contrast-Enhanced (DCE) MRI - Gd-based</i></b>   |                              |                                                                    |                 |                            |                                                          |                                                                                                                                                                                                                                                                             |
| Olmedo-Díaz et al., 2017                                                                        | preclinical/<br>experimental | 27 treated vs.<br>27 untreated rats                                | Bruker 9.4 T    | T1-weighted + Gd           | SN                                                       | colocalization between activated microglia, BBB leakage and iron following to 6-OHDA injection                                                                                                                                                                              |
| Virel et al., 2015                                                                              | preclinical/<br>experimental | 19 treated vs.<br>27 untreated rats                                | Bruker 9.4 T    | T1-weighted + Gd           | whole-brain                                              | microglia translocation without any increase in BBB permeability in PwPD                                                                                                                                                                                                    |
| <b><i>MRI-based neuroimaging studies - Dynamic Contrast-Enhanced (DCE) MRI - SPIO-based</i></b> |                              |                                                                    |                 |                            |                                                          |                                                                                                                                                                                                                                                                             |
| Virel et al., 2015                                                                              | preclinical/<br>experimental | 19 treated vs.<br>27 untreated rats                                | Bruker 9.4 T    | T2*-weighted + SPIO        | whole-brain                                              | microglial translocation without BBB permeability increase                                                                                                                                                                                                                  |

In this table, we highlight how different mentioned PET- and MRI-based neuroimaging methods have been previously used in preclinical models of PD. 6-OHDA: 6-hydroxydopamine. BBB: blood-brain-barrier. DCE: dynamic contrast-enhanced imaging. DKI: diffusion kurtosis imaging. EPI: echo-planar imaging. Gd: gadolinium. GM: grey matter. MRI: magnetic resonance imaging. PD: Parkinson's disease. PET: positron emission tomography. SE: single-echo. SN: substantia nigra. SPIO: superparamagnetic iron oxide particles.
